# Supplementary material
Source: PubMed Central journal article supplement (PMC6380419)

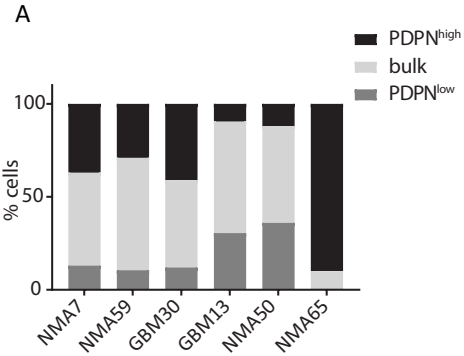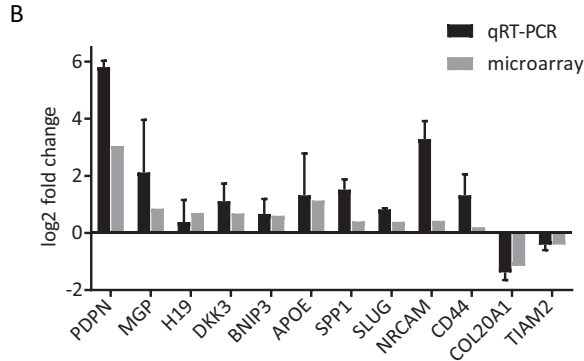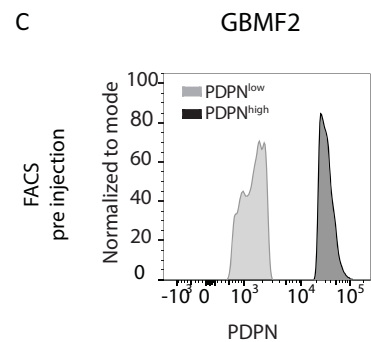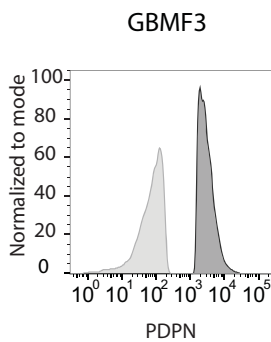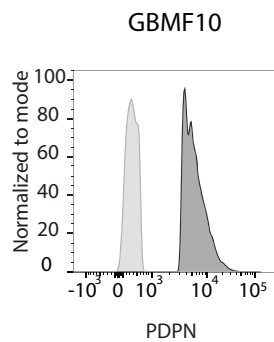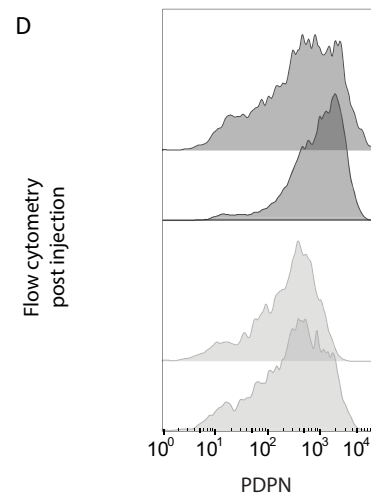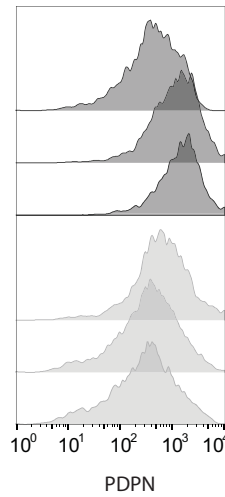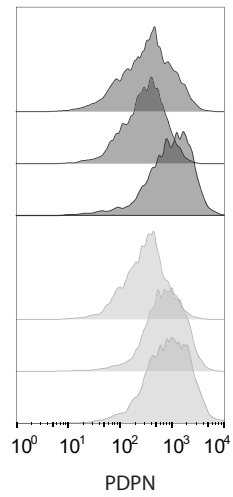

Supplement: noy184_suppl_supplementary_figure_s1.pdf [file noy184_suppl_supplementary_figure_s1.pdf]

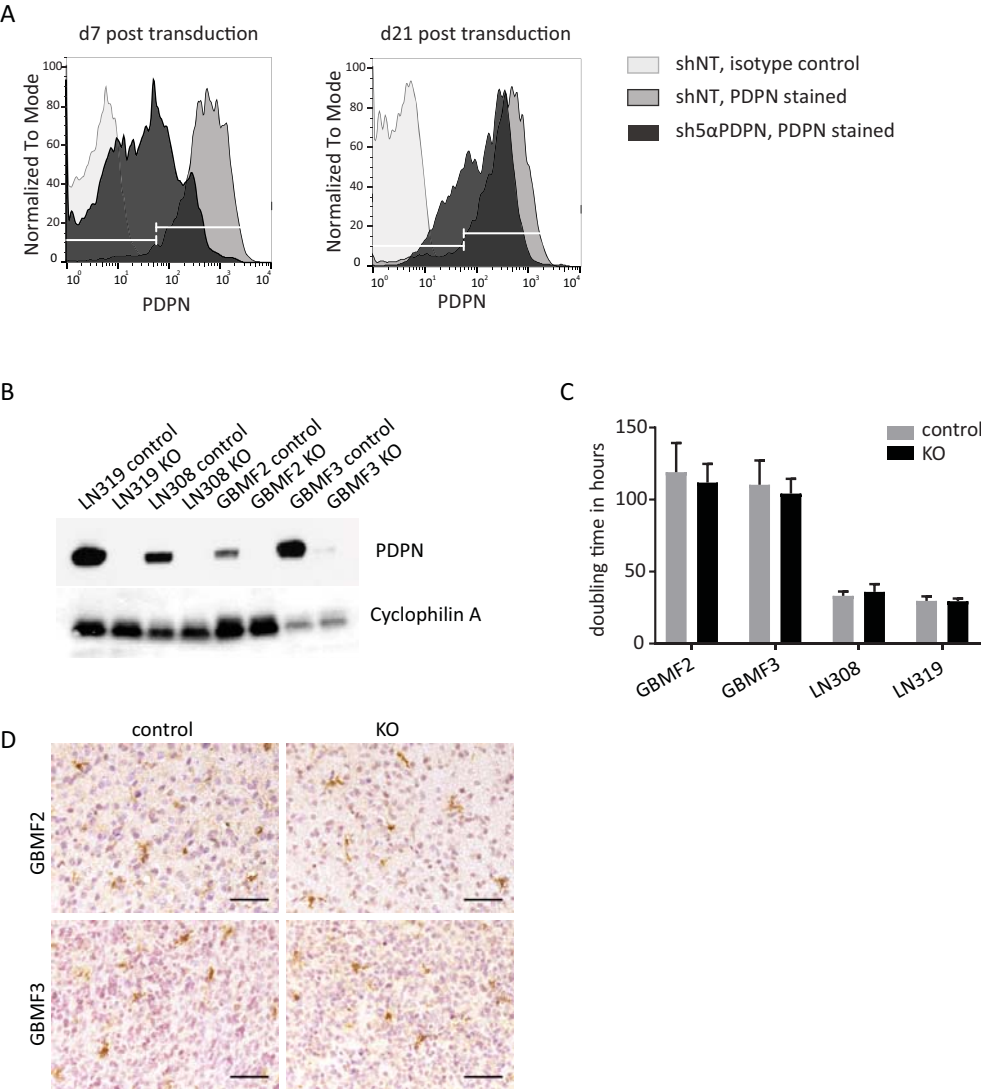

Supplement: noy184_suppl_supplementary_figure_s2.pdf [file noy184_suppl_supplementary_figure_s2.pdf]

A

LN308

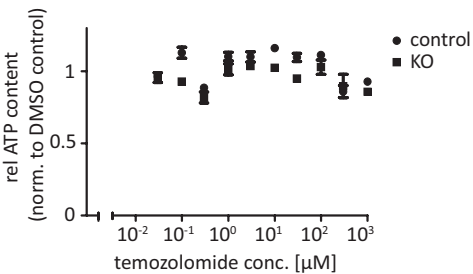

B

LN319

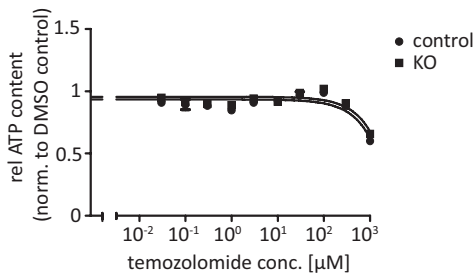

C

LN308

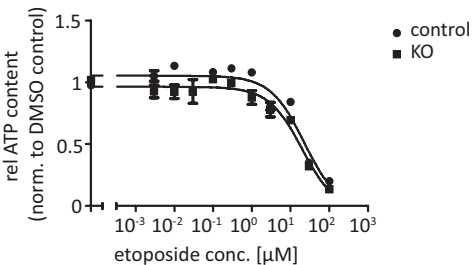

D

LN319

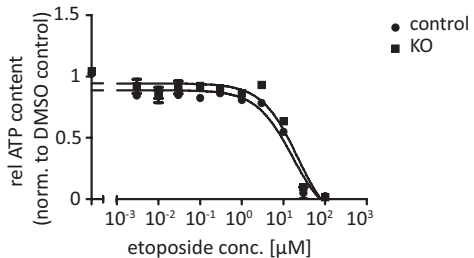

Supplement: noy184_suppl_supplementary_figure_s3.pdf [file noy184_suppl_supplementary_figure_s3.pdf]
